# Supplementary material for: Metabolic Reprogramming of Klebsiella pneumoniae Exposed to Serum and Its Potential Implications in Host Immune System Evasion and Resistance
Source: PubMed Central journal article supplement (PMC11536433; doi:10.1021/acs.jproteome.4c00286), 2024-10-03
Supplement: pr4c00286_si_001.pdf [file pr4c00286_si_001.pdf]

**Metabolic reprogramming of *Klebsiella pneumoniae* exposed to serum and its potential implications in host immune system evasion and resistance**

Amanda Naiara Silva Moraes<sup>1</sup>, Juliana Miranda Tatará<sup>1</sup>, Rafael Lopes da Rosa<sup>1</sup>, Franciele Maboni Siqueira<sup>2</sup>, Guilherme Domingues<sup>3</sup>, Markus Berger<sup>4,5</sup>, Jorge Almeida Guimarães<sup>4</sup>, Afonso Luís Barth<sup>6</sup>, Patricia Orlandi Barth<sup>6</sup>, John R. Yates III<sup>7</sup>, Walter Orlando Beys-da-Silva<sup>1,8</sup>, Lucélia Santi<sup>1,8,\*</sup>

<sup>1</sup> Post-Graduation Program in Cellular and Molecular Biology, Federal University of Rio Grande do Sul. Porto Alegre, RS. Brazil. 91501-970

<sup>2</sup> Faculty of Veterinary, Federal University of Rio Grande do Sul. Porto Alegre, RS. Brazil. 91540-000

<sup>3</sup> Bruno Born Hospital. Lajeado, RS. Brazil. 95900-010

<sup>4</sup> Center of Experimental Research, Clinical Hospital of Porto Alegre. Porto Alegre, RS. Brazil. 90035-903

<sup>5</sup> Tick-Pathogen Transmission Unit, Laboratory of Bacteriology, National Institute of Allergy and Infectious Diseases, Hamilton, MT, USA. 20892

<sup>6</sup> Bacterial Resistance Research Laboratory, Clinical Hospital of Porto Alegre. Porto Alegre, RS. Brazil. 90035-903

<sup>7</sup> Department of Molecular Medicine, Scripps Research. La Jolla, CA. USA. 92037

<sup>8</sup> Faculty of Pharmacy, Federal University of Rio Grande do Sul. Porto Alegre, RS. Brazil. 90610-000

**Table of contents:**

Supplementary Table 1

Supplementary Table 2

**Supplementary Table 1. Exclusive proteins identified after 1 hour of native serum exposure.** Proteins were identified using the software Patternlab, module AAPV, using a probability 0.01.

| <b>Accession number *</b> | <b>Spectral count</b> | <b>Protein identification</b>                                       |
|---------------------------|-----------------------|---------------------------------------------------------------------|
| AEW63575.1                | 242                   | 30S ribosomal subunit protein S12                                   |
| AEW60145.1                | 124                   | enterobactin synthase subunit E                                     |
| AEW60659.1                | 62                    | ribonuclease E                                                      |
| AEW63547.1                | 51                    | 50S ribosomal protein L15                                           |
| AEW62901.1                | 50                    | GDP/GTP pyrophosphokinase                                           |
| AEW63488.1                | 48                    | regulator of ftsI, penicillin binding protein 3, septation function |
| AEW63405.1                | 40                    | ATP-dependent RNA helicase DeaD                                     |
| AEW59216.1                | 38                    | leucyl aminopeptidase                                               |
| AEW59510.1                | 32                    | UDP-N-acetylmuramate--L-alanine ligase                              |
| AEW63837.1                | 28                    | 50S ribosomal protein L33                                           |
| AEW63565.1                | 27                    | 50S ribosomal protein L4                                            |
| AEW60915.1                | 27                    | DNA-binding transcriptional regulator TyrR                          |
| AEW58928.1                | 25                    | isocitrate lyase                                                    |
| AEW62887.1                | 24                    | sulfate adenylyltransferase subunit 2                               |
| AEW60369.1                | 23                    | glutamine ABC transporter permease protein                          |
| AEW62597.1                | 22                    | polyphosphate kinase                                                |
| AEW61822.1                | 22                    | cysteine desulfurase ATPase componente                              |
| AEW60144.1                | 20                    | isochorismate synthase                                              |
| AEW59491.1                | 18                    | isopropylmalate isomerase large subunit                             |
| AEW58701.1                | 17                    | asparagine synthetase AsnA                                          |
| AEW60181.1                | 17                    | putative aminotransferase                                           |
| AEW63797.1                | 17                    | putative glutathione S-transferase                                  |
| AEW60138.1                | 16                    | ATP-dependent serine activating enzyme                              |
| AEW62611.1                | 16                    | GTP-binding protein EngA                                            |
| AEW59410.1                | 16                    | bifunctional aspartokinase I/homoserine dehydrogenase I             |
| AEW59458.1                | 15                    | dimethyladenosine transferase                                       |
| AEW58826.1                | 15                    | ATP-dependent RNA helicase RhlB                                     |
| AEW62669.1                | 15                    | L-aspartate oxidase                                                 |
| AEW59810.1                | 14                    | 1-deoxy-D-xylulose-5-phosphate synthase                             |
| AEW63776.1                | 14                    | major cold shock protein                                            |
| AEW63769.1                | 14                    | putative sugar phosphate isomerase/epimerase                        |
| AEW58785.1                | 13                    | bifunctional aspartate kinase II/homoserine dehydrogenase II        |
| AEW58930.1                | 13                    | transcriptional repressor IclR                                      |
| AEW62987.1                | 13                    | N-acetylglutamate synthase                                          |
| AEW63426.1                | 12                    | 23S rRNA methyltransferase J                                        |
| AEW92118.1                | 12                    | fertility inhibition protein (plasmid)                              |
| AEW59469.1                | 12                    | ATP-dependent helicase HepA                                         |
| AEW61883.1                | 12                    | dsDNA-mimic protein                                                 |
| AEW62915.1                | 12                    | L-serine deaminase 2                                                |

|            |    |                                                                                                |
|------------|----|------------------------------------------------------------------------------------------------|
| AEW62677.1 | 12 | putative NAD(P)-binding and ATP-binding acyl-CoA synthetase                                    |
| AEW58980.1 | 12 | excinuclease ABC subunit A                                                                     |
| AEW62861.1 | 11 | S-adenosylmethionine-dependent methyltransferase                                               |
| AEW62256.1 | 11 | dTDP-D-glucose 4,6-dehydratase                                                                 |
| AEW61020.1 | 11 | Oxidoreductase                                                                                 |
| AEW59115.1 | 11 | putative GTPase HflX                                                                           |
| AEW58916.1 | 11 | hypothetical protein KPHS_02180                                                                |
| AEW59112.1 | 11 | DNA mismatch repair protein                                                                    |
| AEW58821.1 | 11 | ATP-dependent DNA helicase Rep                                                                 |
| AEW63862.1 | 11 | bifunctional (p)ppGpp synthetase II/ guanosine-3',5'-bis pyrophosphate 3'-pyrophosphohydrolase |
| AEW61325.1 | 10 | 6-phosphogluconate dehydrogenase                                                               |
| AEW62851.1 | 9  | iron ABC superfamily ATP binding cassette transporter, binding protein                         |
| AEW60206.1 | 9  | hypothetical protein KPHS_15080                                                                |
| AEW62614.1 | 9  | histidyl-tRNA synthetase                                                                       |
| AEW59571.1 | 9  | sugar fermentation stimulation protein A                                                       |
| AEW60760.1 | 9  | putative glycosyl transferase                                                                  |
| AEW62399.1 | 9  | OmpK36 porin                                                                                   |
| AEW58782.1 | 8  | 50S ribosomal protein L31                                                                      |
| AEW60847.1 | 8  | putative hydroxylase                                                                           |
| AEW60146.1 | 8  | 2,3-dihydro-2,3-dihydroxybenzoate synthetase, isochroismatase                                  |
| AEW62446.1 | 8  | aminotransferase AlaT                                                                          |
| AEW63545.1 | 8  | 30S ribosomal protein S13                                                                      |
| AEW62598.1 | 8  | Exopolyphosphatase                                                                             |
| AEW58927.1 | 8  | malate synthase                                                                                |
| AEW61548.1 | 8  | cryptic nitrate reductase 2 alpha subunit                                                      |
| AEW63718.1 | 8  | hypothetical protein KPHS_50200                                                                |
| AEW63359.1 | 7  | hypothetical protein KPHS_46610                                                                |
| AEW60517.1 | 7  | integration host factor subunit beta                                                           |
| AEW62671.1 | 7  | ATP-dependent RNA helicase SrmB                                                                |
| AEW59924.1 | 7  | phosphoribosylaminoimidazole carboxylase ATPase subunit                                        |
| AEW62886.1 | 7  | sulfate adenylyltransferase subunit 1                                                          |
| AEW61342.1 | 7  | deoxyribose-phosphate aldolase                                                                 |
| AEW62634.1 | 7  | inositol monophosphatase                                                                       |
| AEW58816.1 | 7  | threonine dehydratase                                                                          |
| AEW63765.1 | 7  | biotin sulfoxide reductase                                                                     |
| AEW58971.1 | 7  | tRNA-dihydrouridine synthase A                                                                 |
| AEW59114.1 | 6  | RNA-binding protein Hfq                                                                        |
| AEW58942.1 | 6  | hypothetical protein KPHS_02440                                                                |
| AEW62674.1 | 6  | putative methyltransferase                                                                     |
| AEW61628.1 | 6  | alcohol dehydrogenase class III                                                                |
| AEW63467.1 | 6  | 30S ribosomal protein S9                                                                       |
| AEW60556.1 | 6  | ABC transport system ATP-binding component                                                     |
| AEW60201.1 | 6  | D-alanyl-D-alanine carboxypeptidase DacA                                                       |

|            |   |                                                                                    |
|------------|---|------------------------------------------------------------------------------------|
| AEW63840.1 | 6 | bifunctional phosphopantothencycysteine decarboxylase/phosphopantothenate synthase |
| AEW62643.1 | 6 | putative NAGC-like transcriptional regulator                                       |
| AEW60135.1 | 6 | ferrienterobactin receptor                                                         |
| AEW61659.1 | 5 | transcriptional regulator SlyA                                                     |
| AEW63160.1 | 5 | tRNA (guanine-N(7))-methyltransferase                                              |
| AEW61505.1 | 5 | hypothetical protein KPHS_28070                                                    |
| AEW62318.1 | 5 | putative ATP-binding protein                                                       |
| AEW60143.1 | 5 | iron-enterobactin transporter periplasmic binding protein                          |
| AEW63998.1 | 5 | phosphate transporter subunit                                                      |
| AEW60575.1 | 5 | Acylphosphatase                                                                    |
| AEW60136.1 | 5 | enterochelin esterase                                                              |
| AEW58910.1 | 5 | thiamine-phosphate pyrophosphorylase                                               |
| AEW61934.1 | 5 | 4-diphosphocytidyl-2-C-methyl-D-erythritol kinase                                  |
| AEW62685.1 | 5 | 23S rRNA pseudouridine synthase D                                                  |
| AEW63681.1 | 5 | cell division protein FtsE                                                         |
| AEW58777.1 | 5 | ATP-dependent protease peptidase subunit                                           |
| AEW63976.1 | 5 | chromosomal replication initiator protein DnaA                                     |
| AEW63832.1 | 5 | putative glycosyltransferase                                                       |
| AEW59142.1 | 5 | putative cell envelope opacity-associated protein A                                |
| AEW63410.1 | 5 | tRNA pseudouridine synthase B                                                      |
| AEW58752.1 | 5 | repressor of galETK operon                                                         |
| AEW60530.1 | 5 | condesin subunit B                                                                 |
| AEW59642.1 | 5 | DL-methionine transporter substrate-binding subunit                                |
| AEW63262.1 | 5 | DNA topoisomerase IV subunit A                                                     |
| AEW62862.1 | 4 | hemin ABC superfamily ATP binding cassette transporter, binding protein HmuT       |
| AEW63500.1 | 4 | DNA-binding protein Fis                                                            |
| AEW61184.1 | 4 | dithiobiotin synthetase                                                            |
| AEW61869.1 | 4 | hypothetical protein KPHS_31710                                                    |
| AEW59124.1 | 4 | 23S rRNA (guanosine-2'-O-)-methyltransferase                                       |
| AEW62986.1 | 4 | N-acetylmuramoyl-L-alanine amidase                                                 |
| AEW59498.1 | 4 | LacI family transcriptional regulator, fructose operon transcriptional repressor   |
| AEW59378.1 | 4 | 16S ribosomal RNA m2G1207 methyltransferase                                        |
| AEW59772.1 | 4 | recombination associated protein                                                   |
| AEW62777.1 | 4 | ribonucleotide-diphosphate reductase alpha subunit                                 |
| AEW60170.1 | 4 | hypothetical protein KPHS_14720                                                    |
| AEW63283.1 | 4 | bifunctional heptose 7-phosphate kinase/heptose 1-phosphate adenylyltransferase    |
| AEW58911.1 | 4 | thiamin biosynthesis protein for pyrimidine moiety                                 |
| AEW60383.1 | 4 | putative transport system ATP-binding component                                    |
| AEW61853.1 | 4 | phospho-2-dehydro-3-deoxyheptonate aldolase                                        |
| AEW58716.1 | 4 | serine/threonine protein kinase RdoA                                               |
| AEW63864.1 | 4 | ATP-dependent DNA helicase RecG                                                    |

|            |   |                                                                                        |
|------------|---|----------------------------------------------------------------------------------------|
| AEW59411.1 | 4 | homoserine kinase                                                                      |
| AEW62664.1 | 4 | GTP-binding protein LepA                                                               |
| AEW62355.1 | 4 | ferric iron-catecholate outer membrane transporter                                     |
| AEW60544.1 | 4 | nicotinate phosphoribosyltransferase                                                   |
| AEW60649.1 | 4 | Dihydroorotase                                                                         |
| AEW60161.1 | 4 | methylthioribose kinase                                                                |
| AEW60328.1 | 3 | dithiobiotin synthetase                                                                |
| AEW60284.1 | 3 | quinolinate synthetase                                                                 |
| AEW58915.1 | 3 | endonuclease V                                                                         |
| AEW62061.1 | 3 | ProP effector                                                                          |
| AEW59794.1 | 3 | S-adenosylmethionine:tRNA ribosyltransferase-isomerase                                 |
| AEW61679.1 | 3 | riboflavin synthase subunit alpha                                                      |
| AEW60147.1 | 3 | 2,3-dihydro-2,3-dihydroxybenzoate dehydrogenase                                        |
| AEW59335.1 | 3 | 4-hydroxyphenylacetate catabolism                                                      |
| AEW61865.1 | 3 | integration host factor subunit alpha                                                  |
| AEW59764.1 | 3 | hypothetical protein KPHS_10660                                                        |
| AEW60849.1 | 3 | short-chain dehydrogenase/reductase SDR                                                |
| AEW61939.1 | 3 | peptidyl-tRNA hydrolase                                                                |
| AEW60154.1 | 3 | putative alcohol dehydrogenase                                                         |
| AEW62352.1 | 3 | GTP cyclohydrolase I                                                                   |
| AEW63964.1 | 3 | hypothetical protein KPHS_52660                                                        |
| AEW60098.1 | 3 | putative aminotransferase                                                              |
| AEW60859.1 | 3 | bifunctional indole-3-glycerol phosphate synthase/phosphoribosylanthranilate isomerase |
| AEW59902.1 | 3 | inosine-guanosine kinase                                                               |
| AEW61823.1 | 3 | cysteine desulfurase activator complex subunit SufB                                    |
| AEW61142.1 | 3 | hypothetical protein KPHS_24440                                                        |
| AEW63253.1 | 3 | cystathionine beta-lyase                                                               |
| AEW61658.1 | 2 | MarR family transcriptional regulator, transcriptional regulator for hemolysin         |
| AEW60200.1 | 2 | hypothetical protein KPHS_15020                                                        |
| AEW59806.1 | 2 | transcription antitermination protein NusB                                             |
| AEW58882.1 | 2 | FMN reductase                                                                          |
| AEW59807.1 | 2 | thiamine monophosphate kinase                                                          |
| AEW63331.1 | 2 | hypothetical protein KPHS_46330                                                        |
| AEW61876.1 | 2 | transport protein TonB                                                                 |
| AEW60629.1 | 2 | transcriptional regulator, LysR family                                                 |
| AEW61859.1 | 2 | putative outer membrane lipoprotein                                                    |
| AEW60868.1 | 2 | short chain dehydrogenase                                                              |
| AEW62046.1 | 2 | PTS enzyme IIC, mannose-specific                                                       |
| AEW61761.1 | 2 | gluconate 2-dehydrogenase subunit gamma                                                |
| AEW60470.1 | 2 | arginine transporter permease subunit ArtQ                                             |
| AEW59374.1 | 2 | ferric iron reductase involved in ferric hydroxamate transport                         |
| AEW62267.1 | 2 | polysaccharide export protein                                                          |
| AEW60572.1 | 2 | Methyltransferase                                                                      |

|            |   |                                                                                                     |
|------------|---|-----------------------------------------------------------------------------------------------------|
| AEW63653.1 | 2 | regulator of gluconate (gnt) operon                                                                 |
| AEW64014.1 | 2 | tRNA uridine 5-carboxymethylaminomethyl modification enzyme<br>GidA                                 |
| AEW60327.1 | 2 | biotin biosynthesis protein BioC                                                                    |
| AEW59479.1 | 2 | thiamin/thiamine pyrophosphate ABC superfamily ATP binding<br>cassette transporter, binding protein |
| AEW59895.1 | 2 | DNA polymerase III subunits gamma and tau                                                           |
| AEW60654.1 | 2 | hypothetical protein KPHS_19560                                                                     |
| AEW58974.1 | 2 | replicative DNA helicase                                                                            |
| AEW60330.1 | 2 | excinuclease ABC subunit B                                                                          |
| AEW60387.1 | 2 | hypothetical protein KPHS_16890                                                                     |
| AEW62290.1 | 2 | putative protease                                                                                   |
| AEW60848.1 | 2 | catecholate siderophore receptor Fiu                                                                |
| AEW62503.1 | 2 | Aminotransferase                                                                                    |
| AEW60555.1 | 2 | 23S rRNA m(2)G2445 methyltransferase                                                                |
| AEW59103.1 | 2 | ribosome-associated GTPase                                                                          |
| AEW63586.1 | 2 | putative ATP-binding component of a transport system                                                |
| AEW63683.1 | 2 | RsmD family RNA methyltransferase                                                                   |
| AEW60308.1 | 2 | putative regulatory protein MerR                                                                    |
| AEW60736.1 | 2 | hypothetical protein KPHS_20380                                                                     |
| AEW63329.1 | 2 | putative enzyme, ferredoxin reductase-like, FAD-linked, NADP-<br>linked                             |
| AEW62997.1 | 2 | thymidylate synthase                                                                                |
| AEW58722.1 | 2 | coproporphyrinogen III oxidase                                                                      |
| AEW63637.1 | 2 | glycogen phosphorylase                                                                              |

\* according to database GenBank accession: GCF\_000240185.1

**Supplementary Table 2. Exclusive proteins identified after 4 hours of native serum exposure.** Proteins were identified using the software Patternlab, module AAPV, using a probability 0.01.

| Accession number * | Spectral count | Protein identification                                                    |
|--------------------|----------------|---------------------------------------------------------------------------|
| AEW63837.1         | 82             | 50S ribosomal protein L33                                                 |
| AEW63998.1         | 61             | phosphate transporter subunit                                             |
| AEW62851.1         | 35             | iron ABC superfamily ATP binding cassette transporter, binding<br>protein |
| AEW63565.1         | 17             | 50S ribosomal protein L4                                                  |
| AEW60387.1         | 17             | hypothetical protein KPHS_16890                                           |
| AEW63781.1         | 11             | putative outer membrane protein                                           |
| AEW61158.1         | 10             | sensory histidine kinase DcuS                                             |
| AEW63547.1         | 8              | 50S ribosomal protein L15                                                 |
| AEW62760.1         | 8              | aldehyde dehydrogenase B (lactaldehyde dehydrogenase)                     |

|            |   |                                                                                                  |
|------------|---|--------------------------------------------------------------------------------------------------|
| AEW60177.1 | 6 | sugar ABC transporter, periplasmic sugar-binding protein                                         |
| AEW61842.1 | 6 | 5-methyltetrahydropteroyltriglutamate-homocysteine methyltransferase                             |
| AEW59411.1 | 6 | homoserine kinase                                                                                |
| AEW58911.1 | 6 | thiamin biosynthesis protein for pyrimidine moiety                                               |
| AEW59722.1 | 6 | phosphonate ABC superfamily ATP binding cassette transporter, binding protein                    |
| AEW61235.1 | 6 | 5-methyltetrahydropteroyltriglutamate--homocysteine methyltransferase                            |
| AEW63575.1 | 6 | 30S ribosomal subunit protein S12                                                                |
| AEW58782.1 | 5 | 50S ribosomal protein L31                                                                        |
| AEW60492.1 | 5 | translation initiation factor IF-1                                                               |
| AEW62691.1 | 5 | phospho-2-dehydro-3-deoxyheptonate aldolase                                                      |
| AEW61869.1 | 4 | hypothetical protein KPHS_31710                                                                  |
| AEW59479.1 | 4 | thiamin/thiamine pyrophosphate ABC superfamily ATP binding cassette transporter, binding protein |
| AEW59378.1 | 4 | 16S ribosomal RNA m2G1207 methyltransferase                                                      |
| AEW61628.1 | 4 | alcohol dehydrogenase class III                                                                  |
| AEW61679.1 | 4 | riboflavin synthase subunit alpha                                                                |
| AEW62061.1 | 4 | ProP effector                                                                                    |
| AEW62916.1 | 4 | putative ABC-type transport protein                                                              |
| AEW60614.1 | 4 | hypothetical protein KPHS_19160                                                                  |
| AEW59410.1 | 4 | bifunctional aspartokinase I/homoserine dehydrogenase I                                          |
| AEW63467.1 | 3 | 30S ribosomal protein S9                                                                         |
| AEW62466.1 | 3 | lysine-arginine-ornithine-binding periplasmic protein                                            |
| AEW59490.1 | 3 | isopropylmalate isomerase small subunit                                                          |
| AEW60154.1 | 3 | putative alcohol dehydrogenase                                                                   |
| AEW59650.1 | 3 | UbiE/COQ5 family methyltransferase                                                               |
| AEW59152.1 | 3 | hypothetical protein KPHS_04540                                                                  |
| AEW59058.1 | 3 | putative DSBA oxidoreductase                                                                     |
| AEW60544.1 | 3 | nicotinate phosphoribosyltransferase                                                             |
| AEW63399.1 | 3 | hypothetical protein KPHS_47010                                                                  |
| AEW59027.1 | 3 | ribose ABC superfamily ATP binding cassette transporter, binding protein                         |
| AEW60145.1 | 3 | enterobactin synthase subunit E                                                                  |
| AEW63089.1 | 2 | flavodoxin                                                                                       |
| AEW62685.1 | 2 | 23S rRNA pseudouridine synthase D                                                                |
| AEW63545.1 | 2 | 30S ribosomal protein S13                                                                        |
| AEW58910.1 | 2 | thiamine-phosphate pyrophosphorylase                                                             |
| AEW59642.1 | 2 | DL-methionine transporter substrate-binding subunit                                              |
| AEW58926.1 | 2 | homoserine O-succinyltransferase                                                                 |
| AEW62862.1 | 2 | hemin ABC superfamily ATP binding cassette transporter, binding protein HmuT                     |
| AEW58995.1 | 2 | periplasmic maltose-binding protein                                                              |
| AEW59659.1 | 2 | acyl-CoA dehydrogenase                                                                           |
| AEW63671.1 | 2 | high-affinity branched-chain amino acid ABC transporter periplasmic substrate-binding protein    |
| AEW58927.1 | 2 | malate synthase                                                                                  |

|            |   |                                                               |
|------------|---|---------------------------------------------------------------|
| AEW59806.1 | 2 | transcription antitermination protein NusB                    |
| AEW60649.1 | 2 | dihydroorotase                                                |
| AEW61250.1 | 2 | putative oxidoreductase                                       |
| AEW61325.1 | 2 | 6-phosphogluconate dehydrogenase                              |
| AEW60146.1 | 2 | 2,3-dihydro-2,3-dihydroxybenzoate synthetase, isochroismatase |
| AEW61220.1 | 2 | beta-lactamase SHV-11                                         |
| AEW58928.1 | 2 | isocitrate lyase                                              |

\* according to database GenBank accession: GCF\_000240185.1
